# Supplementary material
Source: PubMed Central journal article supplement (PMC7170513)
Supplement: supp_RA119.010699_155287_1_supp_459757_q47ws6.pdf [file supp_RA119.010699_155287_1_supp_459757_q47ws6.pdf]

**ABC transporters control ATP release through cholesterol-dependent volume-regulated anion channel activity**

**Patrick J. Dunn, Elizabeth J. Salm, and Susumu Tomita**

**A list of materials included**

**Figure S1. The exonuclease inhibitor did not alter hypotonicity-induced calcium responses**

**Figure S2. M $\beta$ CD treatment reduces filipin fluorescence intensity**

**Figure S3. The cellular cholesterol level controls ATP release**

**Figure S4. MDCK cells did not release ATP upon hypotonic stimulation**

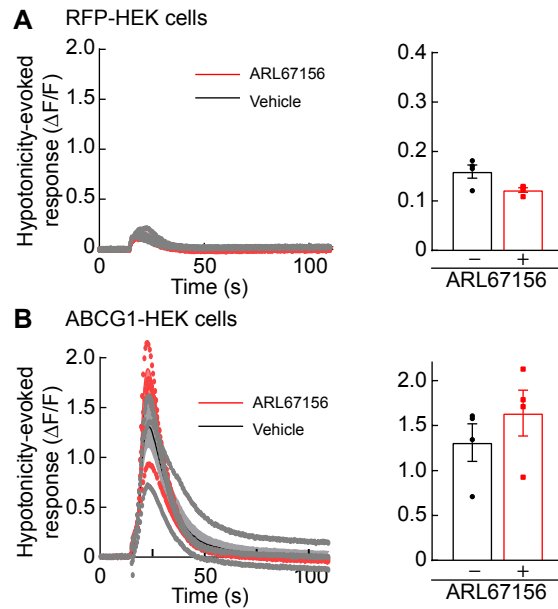

**Figure S1. The exonuclease inhibitor did not alter hypotonicity-induced calcium responses**  
 A and B, HEK cells transfected transiently with RFP (A) or ABCG1 (B) were preincubated with an exonuclease inhibitor, 100  $\mu$ M ARL67156, and calcium responses were measured after hypotonic stimulation (final, 250 mmol/kg). The exonuclease inhibitor did not alter hypotonicity-induced calcium responses. Traces and quantifications of peak calcium responses ( $\Delta F/F$ ) with error bars are shown ( $n = 4$ ). Data are mean  $\pm$  standard deviation.

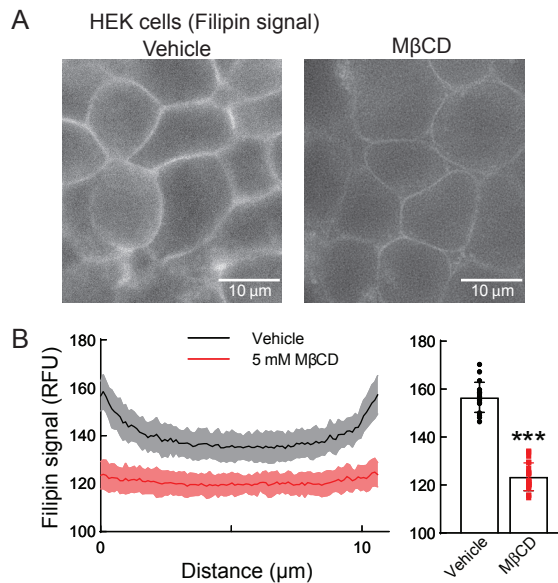

**Figure S2. M $\beta$ CD treatment reduces filipin fluorescence intensity**  
 HEK293 cells were treated with 5 mM methyl-beta cyclodextrin (M $\beta$ CD) for one hour at 37°C for cholesterol depletion. Filipin staining was performed using the cell-based cholesterol detection assay kit (Cayman Chemical) before images were taken using a DeltaVision microscope equipped with an oil Plan Apo N 60x/1.42 NA objective (Olympus). A, representative images of filipin fluorescence in HEK cells treated with vehicle or M $\beta$ CD B, filipin fluorescence intensity was quantified by line scanning of individual HEK cells (18 cells from 3 experiments each). M $\beta$ CD treatment reduced filipin signal. Data are mean  $\pm$  standard deviation; unpaired t test (B); \*\*\* $p < 0.001$ .

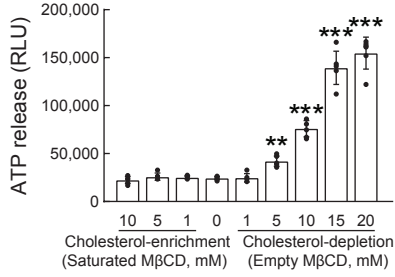

**Figure S3. The cellular cholesterol level controls ATP release**

ATP release induced by hypotonicity (final, 250 mmol/kg) from HEK cells incubated with various concentrations of methyl-beta-cyclodextrin (MβCD) for cholesterol depletion or cholesterol mixed with MβCD for cholesterol repletion (n=6). One-way ANOVA followed by Tukey's test with pairwise comparisons made to vehicle alone (0 mM);  $F(8,45) = 204.3$ ,  $p < 0.001$ . Data are mean  $\pm$  standard deviation; \* $p < 0.05$ , \*\*\* $p < 0.001$

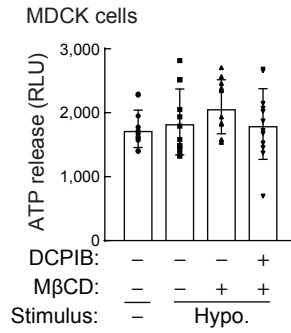

**Figure S4. MDCK cells did not release ATP upon hypotonic stimulation**

Extracellular ATP in the medium was measured from MDCK cells treated with hypotonic solution (final, 185 mmol/kg), 5 mM MβCD and 5 mM MβCD preincubated with a VRAC inhibitor (final, 20 μM DCPIB)(n=12). One-way ANOVA did not detect significant difference. Data are mean  $\pm$  standard deviation.
